# Supplementary material
Source: Springer Nature journal article supplement (https://www.springermedizin.de/resource/supplementary/12957_2011_951_MOESM2_ESM.pdf/9561898)

Figure 2A

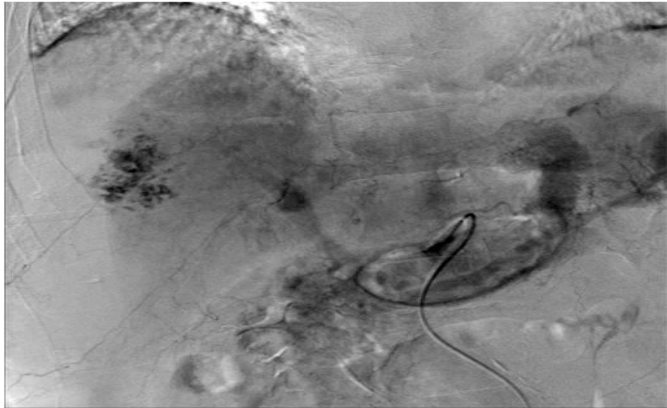

Figure 2B

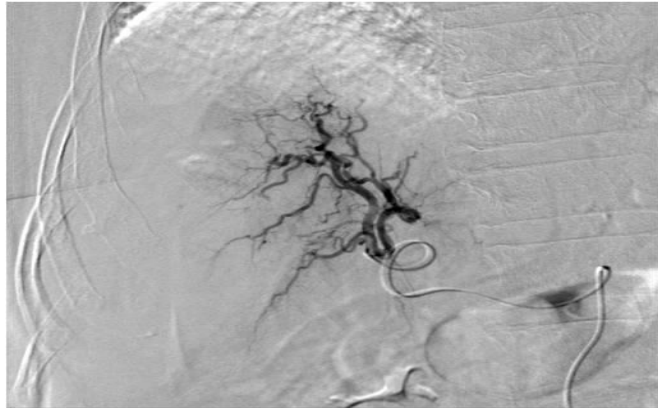

Supplement: MOESM2 [file 9561898]
